# Supplementary material for: Siglec-15 as an immune suppressor and potential target for normalization cancer immunotherapy
Source: Springer Nature journal article supplement (doi:10.1038/s41591-019-0374-x), 2019-03-04
Supplement: 41591_2019_374_MOESM1_ESM.pdf [file 41591_2019_374_MOESM1_ESM.pdf]

In the format provided by the authors and unedited.

# Siglec-15 as an immune suppressor and potential target for normalization cancer immunotherapy

Jun Wang<sup>1,5</sup>, Jingwei Sun<sup>1,5</sup>, Linda N. Liu<sup>2</sup>, Dallas B. Flies<sup>2</sup>, Xinxin Nie<sup>1</sup>, Maria Toki<sup>3</sup>, Jianping Zhang<sup>1</sup>, Chang Song<sup>2</sup>, Melissa Zarr<sup>2</sup>, Xu Zhou <sup>1</sup>, Xue Han<sup>1</sup>, Kristina A. Archer<sup>2</sup>, Thomas O'Neill<sup>2</sup>, Roy S. Herbst<sup>4</sup>, Agedi N. Boto<sup>1,3</sup>, Miguel F. Sanmamed<sup>1</sup>, Solomon Langermann<sup>2</sup>, David L. Rimm <sup>3,4</sup> and Lieping Chen <sup>1,4\*</sup>

---

<sup>1</sup>Department of Immunobiology, Yale University School of Medicine, New Haven, CT, USA. <sup>2</sup>NextCure Inc, Beltsville, MD, USA. <sup>3</sup>Department of Pathology, Yale University School of Medicine, New Haven, CT, USA. <sup>4</sup>Department of Medicine (Medical Oncology), Yale University School of Medicine, New Haven, CT, USA. <sup>5</sup>These authors contributed equally: Jun Wang, Jingwei Sun \*e-mail: [lieping.chen@yale.edu](mailto:lieping.chen@yale.edu)

**Supplementary Table 1**

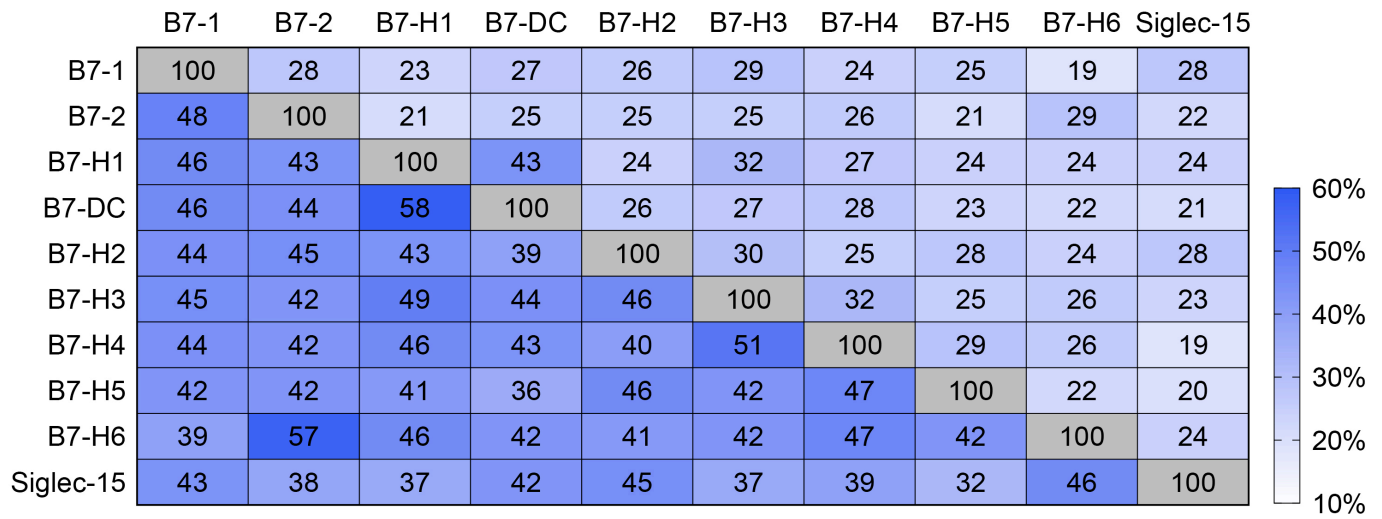

**Supplementary Table 2**

| <b>Yale NSCLC cohort</b> |                       |                |                |
|--------------------------|-----------------------|----------------|----------------|
|                          |                       | Number (n=241) | Percentage (%) |
| <b>Age</b>               | <70                   | 122            | 50.6           |
|                          | ≥70                   | 96             | 39.8           |
|                          | Unknown               | 23             | 9.5            |
| <b>Sex</b>               | Female                | 123            | 51.0           |
|                          | Male                  | 97             | 40.2           |
|                          | Unknown               | 21             | 8.7            |
| <b>Smoking history</b>   | Never smoker          | 32             | 13.3           |
|                          | Former/Current smoker | 174            | 72.2           |
|                          | Unknown               | 35             | 14.5           |
| <b>Stage</b>             | I/II                  | 175            | 72.6           |
|                          | III/IV                | 37             | 15.4           |
|                          | Unknown               | 29             | 12.0           |
| <b>Histology</b>         | ADC                   | 121            | 50.2           |
|                          | SCC                   | 59             | 24.5           |
|                          | Other                 | 38             | 15.8           |
|                          | Unknown               | 23             | 9.5            |

**Supplementary Table 1. Homology of human Siglec-15 to the B7 family proteins.** An alignment of human Siglec-15 to human B7 family proteins was conducted using the Protein Blast program (NCBI). Data are displayed as the identity (x -axis) and the identity plus similarity (y -axis) of the extracellular domains of these molecules.

**Supplementary Table 2: Clinicopathological characteristics of the patients from the Yale NSCLC cohort.**
